# Supplementary material for: Die deutsche Selbstbeurteilungsversion des Strengths and Difficulties Questionnaire (SDQ-Deu-S)
Source: Atypon-hosted journal article supplement (doi:10.1026/0012-1924/a000153), 2015-10-01
Supplement: 0012-1924_a000153_esm1.pdf [file 0012-1924_a000153_esm1.pdf]

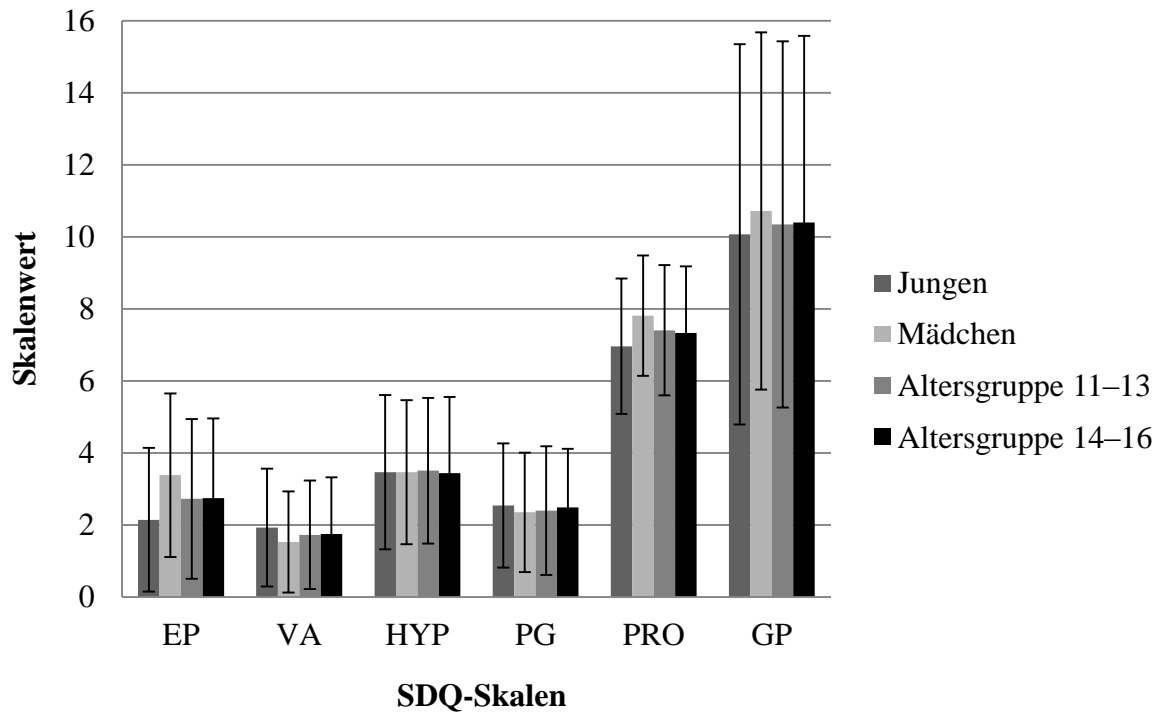

Anmerkungen: EP = Emotionale Probleme, VA = Verhaltensauffälligkeiten, HYP = Aufmerksamkeitsprobleme/Hyperaktivität, PG = Probleme mit Gleichaltrigen, PRO = Prosoziales Verhalten, GP = Gesamtproblemwert.

Abbildung 1. Grafische Darstellung der Skalenmittelwerte je Geschlecht und Altersgruppe.

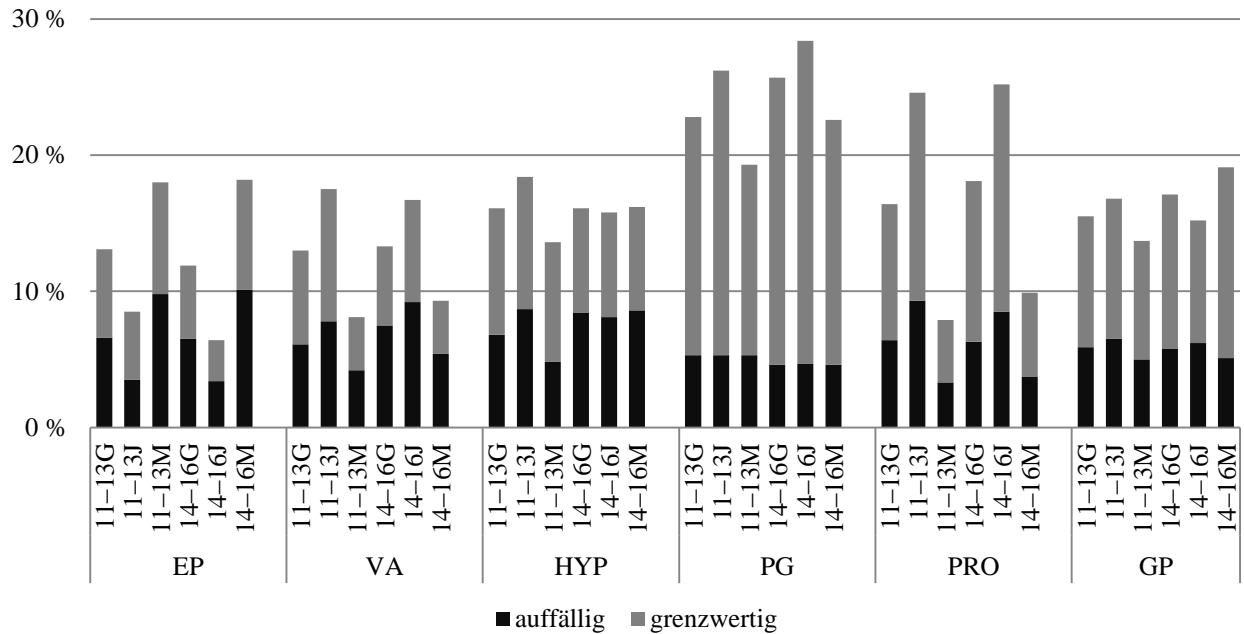

Anmerkungen: EP = Emotionale Probleme, VA = Verhaltensauffälligkeiten, HYP = Aufmerksamkeitsprobleme/ Hyperaktivität, PG = Probleme mit Gleichaltrigen, PRO = Prosoziales Verhalten, GP = Gesamtproblemwert, 11-13/14-16 = Altersgruppe der 11;0-13;11-/14;0-16;11-jährigen, G/J/M = Gesamtgruppe/Jungen/Mädchen.

Abbildung 2. Graphische Darstellung der prozentualen Verteilung von auffälligen und grenzwertigen Jugendlichen in dieser Stichprobe bei Auswertung nach britischen Grenzwerten.

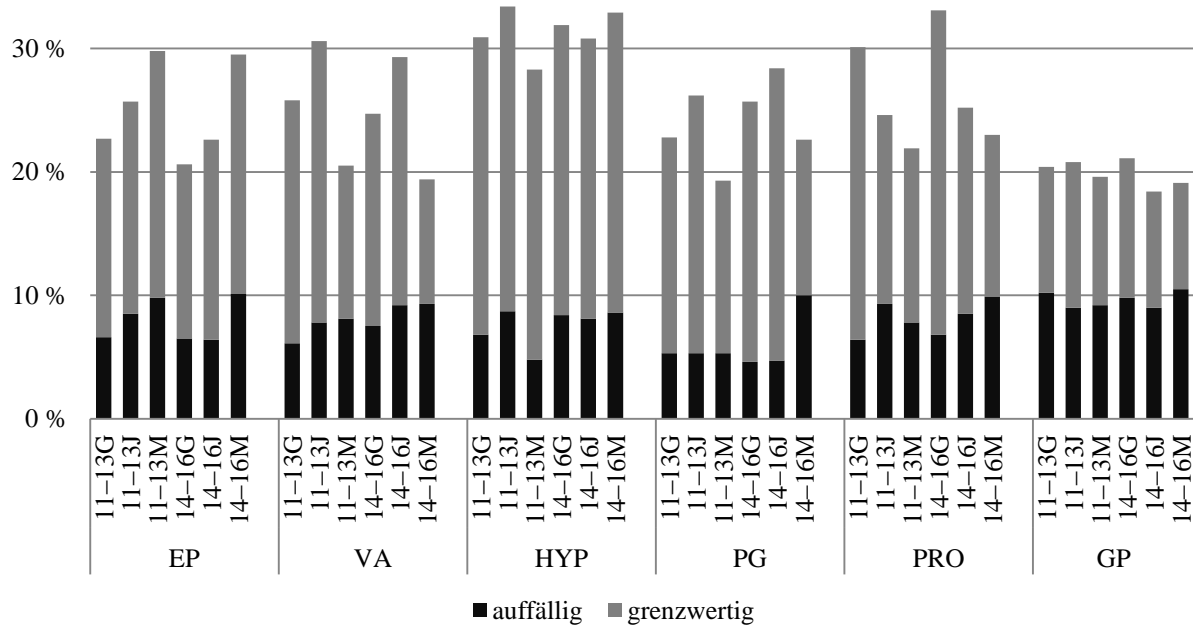

Anmerkungen: EP = Emotionale Probleme, VA = Verhaltensauffälligkeiten, HYP = Aufmerksamkeitsprobleme/ Hyperaktivität, PG = Probleme mit Gleichaltrigen, PRO = Prosoziales Verhalten, GP = Gesamtproblemwert, 11-13/14-16 = Altersgruppe der 11;0-13;11-/14;0-16;11-jährigen, G/J/M = Gesamtgruppe/Jungen/Mädchen.

Abbildung 3. Graphische Darstellung der prozentualen Verteilung von auffälligen und grenzwertigen Jugendlichen nach in dieser Studie vorgeschlagenen Grenzwerten.
