# Supplementary material for: Die deutsche Selbstbeurteilungsversion des Strengths and Difficulties Questionnaire (SDQ-Deu-S)
Source: Atypon-hosted journal article supplement (doi:10.1026/0012-1924/a000153), 2015-10-01
Supplement: 0012-1924_a000153_esm2.pdf [file 0012-1924_a000153_esm2.pdf]

Elektronisches Supplement 2. Rohwerteverteilung in der deutschen Selbstbeurteilungsversion des Strengths and Difficulties Questionnaire (SDQ-Deu-S) bei Jungen ( $n = 845$ ) und Mädchen ( $n = 794$ )

Table 1. Rohwerteverteilung der einzelnen SDQ-Skalen bei Jungen ( $n = 845$ )

| Rohwert | Emotionale Probleme |     | Verhaltens-auffälligkeiten |     | Hyperaktivität |     | Probleme mit Gleichaltrigen |     | Prosoziales Verhalten |     |
|---------|---------------------|-----|----------------------------|-----|----------------|-----|-----------------------------|-----|-----------------------|-----|
|         | %                   | cum | %                          | cum | %              | cum | %                           | cum | %                     | cum |
| 0       | 24                  | 24  | 19                         | 19  | 10             | 10  | 9                           | 9   | –                     | –   |
| 1       | 25                  | 48  | 29                         | 49  | 11             | 21  | 23                          | 32  | < 1                   | < 1 |
| 2       | 16                  | 65  | 22                         | 70  | 13             | 34  | 23                          | 55  | < 1                   | 1   |
| 3       | 12                  | 76  | 13                         | 83  | 16             | 50  | 18                          | 73  | 2                     | 3   |
| 4       | 10                  | 86  | 9                          | 92  | 18             | 68  | 14                          | 88  | 6                     | 9   |
| 5       | 7                   | 93  | 5                          | 96  | 15             | 83  | 8                           | 95  | 16                    | 25  |
| 6       | 4                   | 96  | 3                          | 99  | 9              | 92  | 3                           | 98  | 15                    | 40  |
| 7       | 2                   | 99  | < 1                        | 100 | 4              | 96  | 1                           | 99  | 18                    | 58  |
| 8       | < 1                 | 100 | < 1                        | 100 | 3              | 99  | < 1                         | 99  | 20                    | 77  |
| 9       | < 1                 | 100 | < 1                        | 100 | < 1            | 100 | < 1                         | 100 | 14                    | 91  |
| 10      | –                   | –   | –                          | –   | < 1            | 100 | < 1                         | 100 | 9                     | 100 |

Anmerkungen:  $n$  = Größe der Stichprobe, SDQ = Strengths and Difficulties Questionnaire, % = Prozentanteil des jeweiligen Rohwertes, cum = kumulierte Prozentzahl (Prozentrang). Bei den Prozentanteilen und kumulierten Prozentwerten handelt es sich um gerundete Werte.

Table 2. Rohwerteverteilung für die SDQ-Gesamproblemskala bei Jungen ( $n = 845$ )

| Rohwert | %   | cum | Rohwert | % | cum | Rohwert | %   | cum |
|---------|-----|-----|---------|---|-----|---------|-----|-----|
| 0       | < 1 | < 1 | 10      | 7 | 58  | 20      | 3   | 96  |
| 1       | 1   | 2   | 11      | 7 | 65  | 21      | 2   | 98  |
| 2       | 3   | 5   | 12      | 4 | 70  | 22      | < 1 | 98  |
| 3       | 4   | 8   | 13      | 7 | 76  | 23      | < 1 | 99  |
| 4       | 5   | 14  | 14      | 5 | 81  | 24      | < 1 | 99  |
| 5       | 6   | 20  | 15      | 4 | 85  | 25–40   | < 1 | 100 |
| 6       | 7   | 27  | 16      | 3 | 88  |         |     |     |
| 7       | 8   | 35  | 17      | 3 | 90  |         |     |     |
| 8       | 9   | 44  | 18      | 2 | 92  |         |     |     |
| 9       | 7   | 52  | 19      | 2 | 94  |         |     |     |

Anmerkungen:  $n$  = Größe der Stichprobe, SDQ = Strengths and Difficulties Questionnaire, % = Prozentanteil des jeweiligen Rohwertes, cum = kumulierte Prozentzahl (Prozentrang). Bei den Prozentanteilen und kumulierten Prozentwerten handelt es sich um gerundete Werte.

*Elektronisches Supplement 2. Rohwerteverteilung in der deutschen Selbstbeurteilungsversion des Strengths and Difficulties Questionnaire SDQ-Deu-S) bei Jungen (n = 845) und Mädchen (n = 794)*

(Fortsetzung)

*Tabelle 3. Rohwerteverteilung der einzelnen SDQ-Skalen bei Mädchen (n = 794)*

| Rohwert | Emotionale Probleme |     | Verhaltens-auffälligkeiten |     | Hyperaktivität |     | Probleme mit Gleichaltrigen |     | Prosoziales Verhalten |     |
|---------|---------------------|-----|----------------------------|-----|----------------|-----|-----------------------------|-----|-----------------------|-----|
|         | %                   | cum | %                          | cum | %              | cum | %                           | cum | %                     | cum |
| 0       | 9                   | 9   | 24                         | 24  | 7              | 7   | 9                           | 9   | < 1                   | < 1 |
| 1       | 14                  | 23  | 36                         | 59  | 11             | 18  | 26                          | 35  | –                     | –   |
| 2       | 18                  | 41  | 20                         | 79  | 17             | 35  | 24                          | 59  | < 1                   | < 1 |
| 3       | 13                  | 54  | 11                         | 90  | 17             | 52  | 20                          | 78  | < 1                   | 1   |
| 4       | 17                  | 70  | 5                          | 95  | 17             | 70  | 11                          | 89  | 3                     | 4   |
| 5       | 12                  | 83  | 4                          | 99  | 15             | 85  | 6                           | 95  | 5                     | 9   |
| 6       | 8                   | 91  | 1                          | 99  | 9              | 93  | 4                           | 98  | 13                    | 22  |
| 7       | 5                   | 96  | < 1                        | 100 | 4              | 98  | < 1                         | 99  | 16                    | 38  |
| 8       | 2                   | 98  | < 1                        | 100 | 2              | 99  | < 1                         | 99  | 20                    | 57  |
| 9       | 2                   | 99  | –                          | –   | < 1            | 100 | < 1                         | 100 | 25                    | 82  |
| 10      | < 1                 | 100 | –                          | –   | < 1            | 100 | < 1                         | 100 | 18                    | 100 |

*Anmerkungen:* n = Größe der Stichprobe, SDQ = Strengths and Difficulties Questionnaire, % = Prozentanteil des jeweiligen Rohwertes, cum = kumulierte Prozentzahl (Prozentrang). Bei den Prozentanteilen und kumulierten Prozentwerten handelt es sich um gerundete Werte.

*Tabelle 4. Rohwerteverteilung für die SDQ-Gesamtproblemskala bei Mädchen (n = 794)*

| Rohwert | %   | cum | Rohwert | % | cum | Rohwert | %   | cum |
|---------|-----|-----|---------|---|-----|---------|-----|-----|
| 0       | < 1 | < 1 | 10      | 9 | 54  | 20      | 2   | 97  |
| 1       | < 1 | < 1 | 11      | 6 | 59  | 21      | 1   | 98  |
| 2       | 1   | 2   | 12      | 8 | 67  | 22      | < 1 | 98  |
| 3       | 3   | 5   | 13      | 6 | 73  | 23      | < 1 | 99  |
| 4       | 4   | 9   | 14      | 5 | 78  | 24      | < 1 | 99  |
| 5       | 6   | 15  | 15      | 5 | 83  | 25      | < 1 | 99  |
| 6       | 5   | 19  | 16      | 3 | 87  | 26      | –   | –   |
| 7       | 8   | 28  | 17      | 3 | 90  | 27-40   | < 1 | 100 |
| 8       | 7   | 35  | 18      | 3 | 93  |         |     |     |
| 9       | 10  | 45  | 19      | 2 | 95  |         | –   | –   |

*Anmerkungen:* n = Größe der Stichprobe, SDQ = Strengths and Difficulties Questionnaire, % = Prozentanteil des jeweiligen Rohwertes, cum = kumulierte Prozentzahl (Prozentrang). Bei den Prozentanteilen und kumulierten Prozentwerten handelt es sich um gerundete Werte.
